# Supplementary material
Source: publisher figshare collection journal article supplement (https://sage.figshare.com/ndownloader/files/12728069)
Supplement: Supplementary file 1 [file 12728069]

## Appendix A

### Testing items in the acceptability judgment task

#### *Grammatical SRs*

The person that is beating the drum is his brother.

The dog that is chasing the man is black.

The boy that is reading the book is Lee.

The girl that is eating breakfast is my friend.

The man that is repairing a bike is his father.

#### *Grammatical SRs*

The woman that she is walking a dog is his mother.

That child that he is watching TV is his son.

The person that he is cleaning the house is my aunt.

The man that he is planting trees is a teacher.

The student that he is doing his homework is Lee.

#### *Grammatical ORs*

The girl that the woman is hugging is her sister.

The box that the man is carrying is heavy.

The shoes that Xiaomin is washing are white.

The question that he is answering is easy.

The door that the man is opening is brown.

#### *Ungrammatical ORs*

The paper plane that the boy is making it is big.

The boy that I am talking with him is Tom.

The picture that Lee is drawing it is beautiful.

The man that they are beating him is a thief.

The wall that the worker is painting it is tall.

## Appendix B

### SR instances in Study 1

#### Instance 1

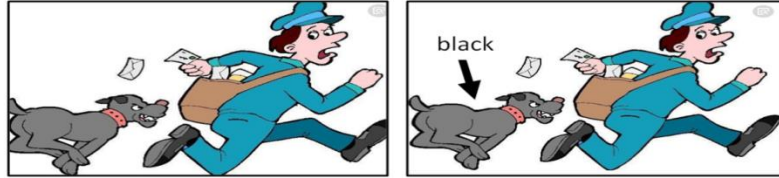

Phase 1: The dog is chasing a man. The dog is black.

Phase 2: The dog that is chasing the man is black.

#### Instance 2

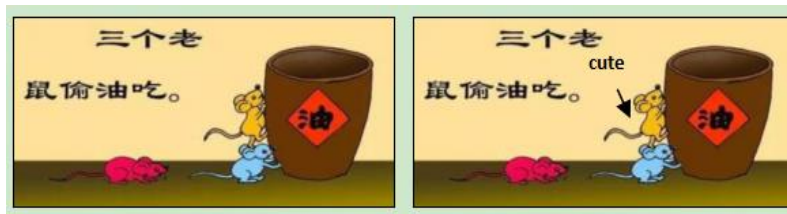

Phase 1: The mice are stealing the oil. The mice are cute.

The mice that are stealing the oil are cute

#### Instance 3

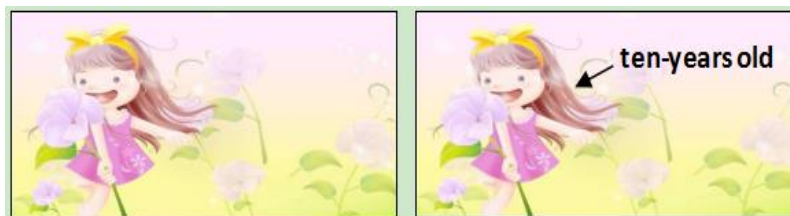

Phase 1: The girl is ten-years old. The girl is picking the flower.

Phase 2: The girl that is picking the flower is ten-years old.

#### Instance 4

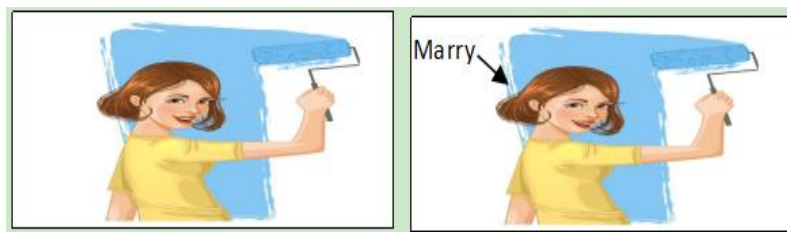

Phase 1: The girl is Marry. She is painting the wall.

Phase 2: The girl that is painting the wall is Marry.

**Instance 5**

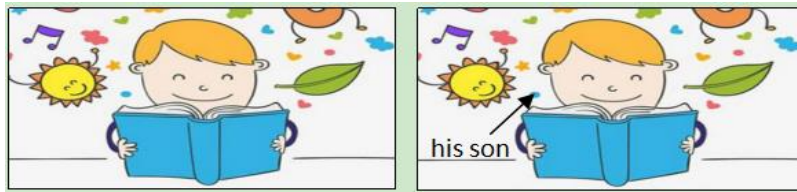

Phase 1: The boy is reading the book. He is his son.

Phase 2: The boy that is reading the book is his son.

**Instance 6**

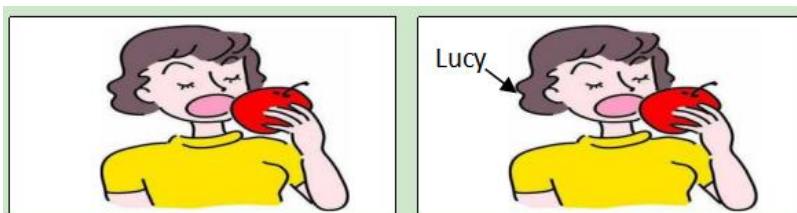

Phase 1: The girl is eating an apple. She is Lucy.

Phase 2: The girl that is eating an apple is Lucy.

## OR instances in Study 2

### Instance 1

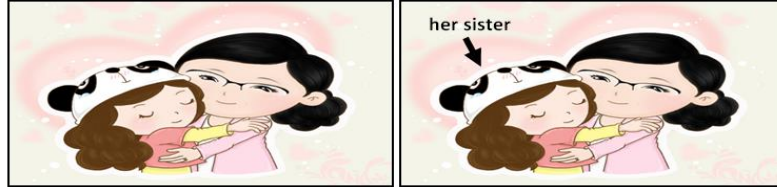

Phase 1: The girl is her sister. The woman is hugging the girl.

Phase 2: The girl that the woman is hugging is her sister.

### Instance 2

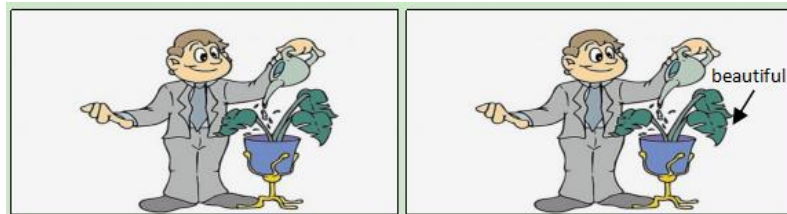

Phase 1: The flower is beautiful. The man is watering the flower.

Phase 2: The flower that the man is watering is beautiful.

### Instance 3

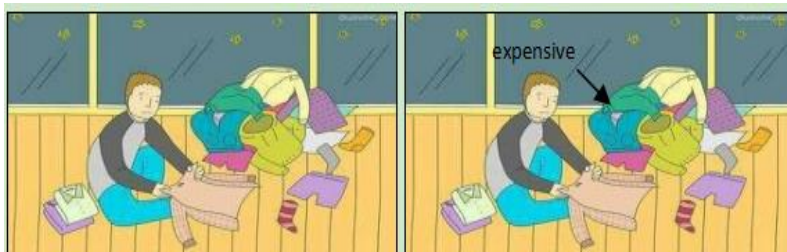

Phase 1: The clothes are expensive. The boy is folding the clothes.

Phase 2: The clothes that the boy is folding are expensive.

### Instance 4

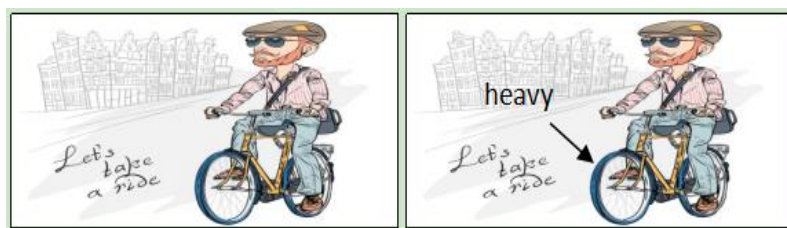

Phase 1: The bike is heavy. The man is riding the bike.

Phase 2: The bike that the man is riding is heavy.

**Instance 5**

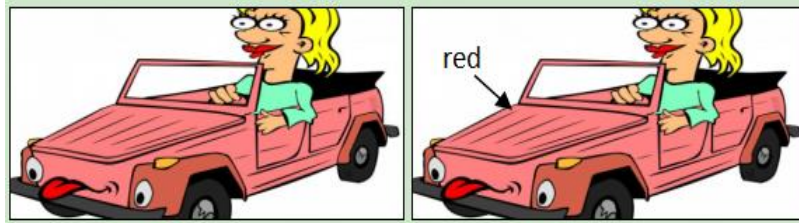

Phase 1: The car is red. The woman is driving the car.

Phase 2: The car that the woman is driving is red.

**Instance 6**

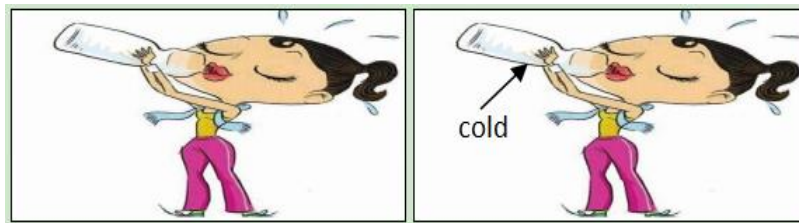

Phase 1: The water is cold. Lucy is drinking the water.

Phase 2: The water that Lucy is drinking is cold.

## Appendix C

### Sample Pictures used in Study 1

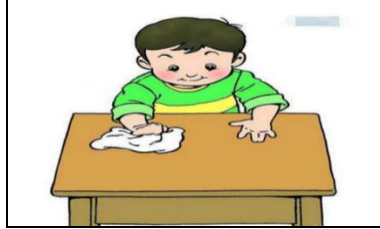

The boy is cleaning the desk. The boy is Tom.

The boy\_\_\_\_\_.

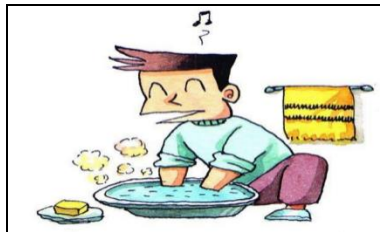

The boy is washing his hands.

The boy is my friend.

The boy\_\_\_\_\_.

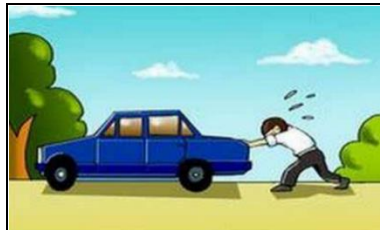

The man is pushing his car. He is a driver.

The man\_\_\_\_\_.

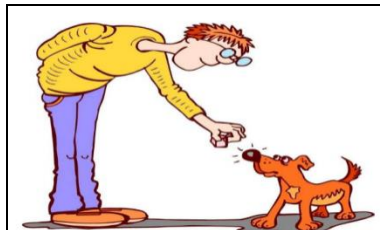

The boy is feeding his dog. The boy is clever. The boy\_\_\_\_\_.

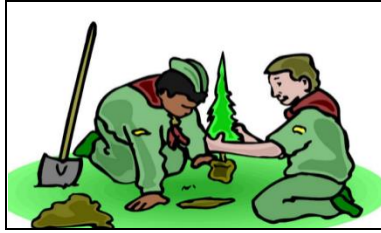

The two boys are planting trees.  
 They are young.  
 The two boys \_\_\_\_\_.

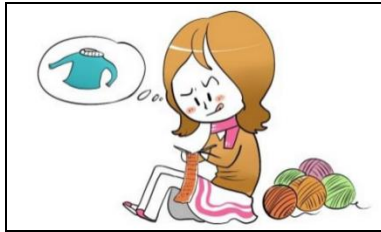

The girl is knitting a sweater. The girl is his sister.  
 The girl \_\_\_\_\_.

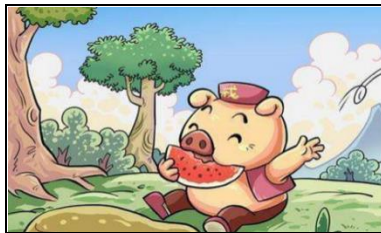

The pig is fat. It is eating watermelon.  
 The pig \_\_\_\_\_.

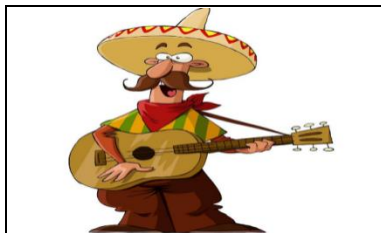

The man is a singer. He is playing guitar.  
 The man \_\_\_\_\_.

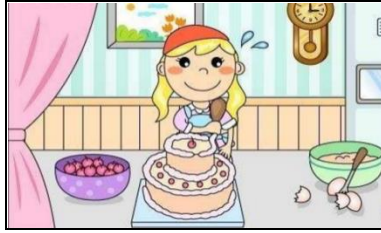

The girl is very pretty. She is making a cake.  
The girl \_\_\_\_\_.

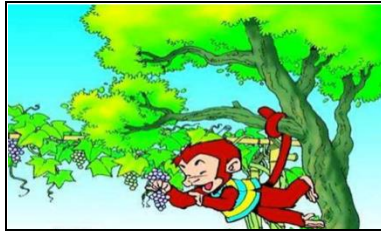

The monkey is his friend. He is picking grapes.  
The monkey \_\_\_\_\_.

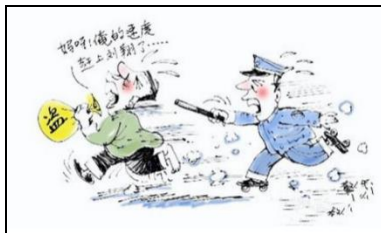

The policeman is his father. He is catching a thief  
The policeman \_\_\_\_\_.

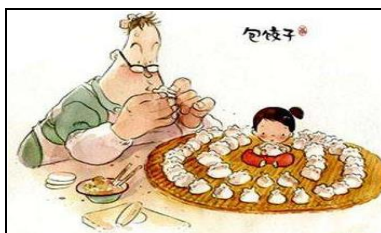

The woman is her mother. She is making dumplings.  
The woman \_\_\_\_\_.



## Sample Pictures used in Study 2

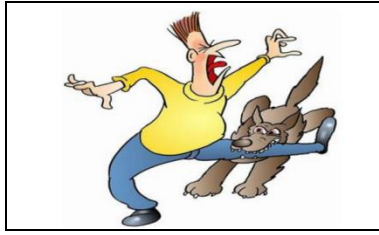

The man is his uncle. The dog is biting his uncle.

The man \_\_\_\_\_.

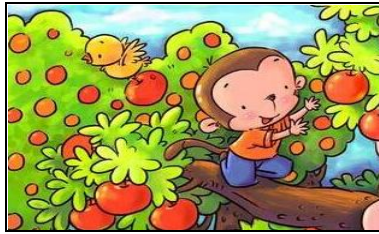

The apple is red. The monkey is picking the apple.

The apple\_\_\_\_\_.

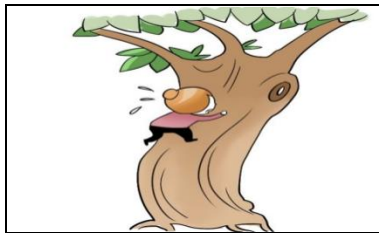

The tree is tall. The boy is climbing the tree.

The tree\_\_\_\_\_.

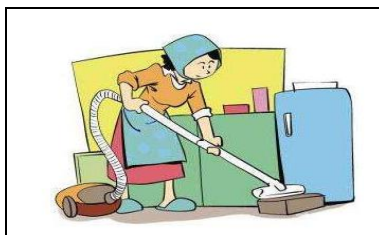

The floor is dirty. The woman is cleaning the floor.

The floor\_\_\_\_\_.

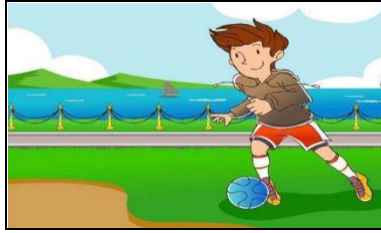

The football is blue. The boy is playing the football.  
The football\_\_\_\_\_.

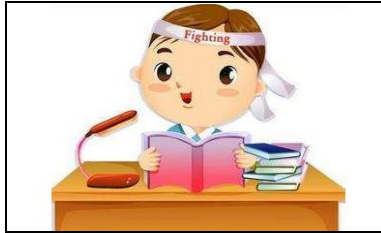

The book is mine. The girl is reading the book.  
The book \_\_\_\_\_.

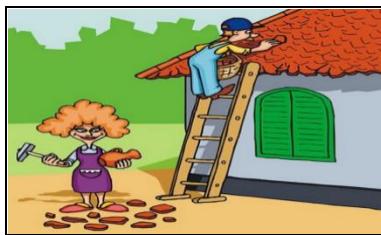

This house is big. The man is fixing the house.  
The house\_\_\_\_\_.

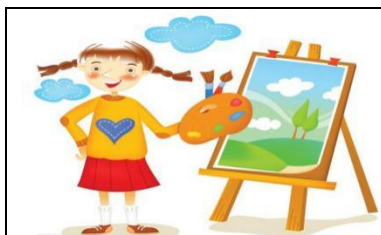

The picture is beautiful. The girl is painting the picture.  
The picture\_\_\_\_\_.

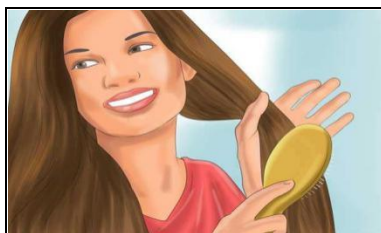

The hair is long. The girl is combing the hair.

The hair\_\_\_\_\_.

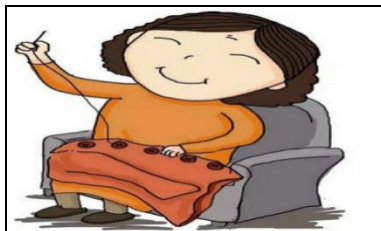

The coat looks big. The woman is making the coat.

The coat\_\_\_\_\_.

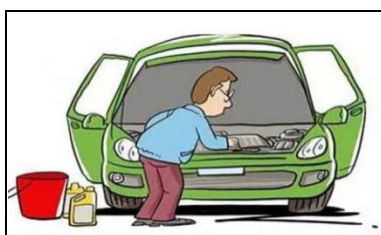

The car is green. The man is repairing the car.

The car\_\_\_\_\_.

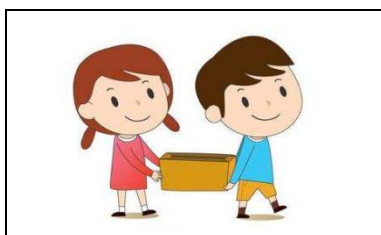

The box is yellow. They are carrying the box.

The box\_\_\_\_\_.
